# Supplementary material
Source: PubMed Central journal article supplement (PMC5378506)
Supplement: supp_5.1.E255_2016-0142_checklist.pdf [file supp_5.1.E255_2016-0142_checklist.pdf]

For this purpose, we considered ourselves a ‘cohort study’

- (DONE = we meet these criteria and confirm this to be present and correct in the manuscript)
- (N/A = we felt this was Non-Applicable to us)

|                              | Item No | Recommendation                                                                                                                                                                                                                                                                                                                                                                                        |
|------------------------------|---------|-------------------------------------------------------------------------------------------------------------------------------------------------------------------------------------------------------------------------------------------------------------------------------------------------------------------------------------------------------------------------------------------------------|
| <b>Title and abstract</b>    | 1       | (a) Indicate the study’s design with a commonly used term in the title or the abstract <b>DONE</b><br>(b) Provide in the abstract an informative and balanced summary of what was done and what was found <b>DONE</b>                                                                                                                                                                                 |
| <b>Introduction</b>          |         |                                                                                                                                                                                                                                                                                                                                                                                                       |
| Background/rationale         | 2       | Explain the scientific background and rationale for the investigation being reported <b>DONE</b>                                                                                                                                                                                                                                                                                                      |
| Objectives                   | 3       | State specific objectives, including any prespecified hypotheses <b>DONE</b>                                                                                                                                                                                                                                                                                                                          |
| <b>Methods</b>               |         |                                                                                                                                                                                                                                                                                                                                                                                                       |
| Study design                 | 4       | Present key elements of study design early in the paper <b>DONE</b>                                                                                                                                                                                                                                                                                                                                   |
| Setting                      | 5       | Describe the setting, locations, and relevant dates, including periods of recruitment, exposure, follow-up, and data collection <b>DONE</b>                                                                                                                                                                                                                                                           |
| Participants                 | 6       | (a) <i>Cohort study</i> —Give the eligibility criteria, and the sources and methods of selection of participants. <b>DONE</b> Describe methods of follow-up <b>N/A</b><br>(b) <i>Cohort study</i> —For matched studies, give matching criteria and number of exposed and unexposed <b>N/A</b>                                                                                                         |
| Variables                    | 7       | Clearly define all outcomes, exposures, predictors, potential confounders, and effect modifiers. Give diagnostic criteria, if applicable <b>DONE</b>                                                                                                                                                                                                                                                  |
| Data sources/<br>measurement | 8*      | For each variable of interest, give sources of data and details of methods of assessment (measurement). Describe comparability of assessment methods if there is more than one group <b>DONE</b>                                                                                                                                                                                                      |
| Bias                         | 9       | Describe any efforts to address potential sources of bias <b>DONE</b>                                                                                                                                                                                                                                                                                                                                 |
| Study size                   | 10      | Explain how the study size was arrived at <b>DONE</b>                                                                                                                                                                                                                                                                                                                                                 |
| Quantitative variables       | 11      | Explain how quantitative variables were handled in the analyses. If applicable, describe which groupings were chosen and why <b>DONE</b>                                                                                                                                                                                                                                                              |
| Statistical methods          | 12      | (a) Describe all statistical methods, including those used to control for confounding <b>DONE</b><br>(b) Describe any methods used to examine subgroups and interactions <b>DONE</b><br>(c) Explain how missing data were addressed <b>DONE</b><br>(d) <i>Cohort study</i> —If applicable, explain how loss to follow-up was addressed <b>N/A</b><br>(e) Describe any sensitivity analyses <b>N/A</b> |

Continued on next page

| <b>Results</b>           |     |                                                                                                                                                                                                                                                                                                                                                                                                                                                  |
|--------------------------|-----|--------------------------------------------------------------------------------------------------------------------------------------------------------------------------------------------------------------------------------------------------------------------------------------------------------------------------------------------------------------------------------------------------------------------------------------------------|
| Participants             | 13* | (a) Report numbers of individuals at each stage of study—eg numbers potentially eligible, examined for eligibility, confirmed eligible, included in the study, completing follow-up, and analysed <b>DONE</b><br>(b) Give reasons for non-participation at each stage <b>N/A</b><br>(c) Consider use of a flow diagram <b>Not necessary</b>                                                                                                      |
| Descriptive data         | 14* | (a) Give characteristics of study participants (eg demographic, clinical, social) and information on exposures and potential confounders <b>DONE</b><br>(b) Indicate number of participants with missing data for each variable of interest <b>DONE</b><br>(c) <i>Cohort study</i> —Summarise follow-up time (eg, average and total amount) <b>N/A</b>                                                                                           |
| Outcome data             | 15* | <i>Cohort study</i> —Report numbers of outcome events or summary measures over time <b>DONE</b>                                                                                                                                                                                                                                                                                                                                                  |
| <hr/>                    |     |                                                                                                                                                                                                                                                                                                                                                                                                                                                  |
| Main results             | 16  | (a) Give unadjusted estimates and, if applicable, confounder-adjusted estimates and their precision (eg, 95% confidence interval). Make clear which confounders were adjusted for and why they were included <b>DONE</b><br>(b) Report category boundaries when continuous variables were categorized <b>DONE</b><br>(c) If relevant, consider translating estimates of relative risk into absolute risk for a meaningful time period <b>N/A</b> |
| Other analyses           | 17  | Report other analyses done—eg analyses of subgroups and interactions, and sensitivity analyses <b>DONE</b>                                                                                                                                                                                                                                                                                                                                       |
| <hr/>                    |     |                                                                                                                                                                                                                                                                                                                                                                                                                                                  |
| <b>Discussion</b>        |     |                                                                                                                                                                                                                                                                                                                                                                                                                                                  |
| Key results              | 18  | Summarise key results with reference to study objectives <b>DONE</b>                                                                                                                                                                                                                                                                                                                                                                             |
| Limitations              | 19  | Discuss limitations of the study, taking into account sources of potential bias or imprecision. Discuss both direction and magnitude of any potential bias <b>DONE</b>                                                                                                                                                                                                                                                                           |
| Interpretation           | 20  | Give a cautious overall interpretation of results considering objectives, limitations, multiplicity of analyses, results from similar studies, and other relevant evidence <b>DONE</b>                                                                                                                                                                                                                                                           |
| Generalisability         | 21  | Discuss the generalisability (external validity) of the study results <b>DONE</b>                                                                                                                                                                                                                                                                                                                                                                |
| <hr/>                    |     |                                                                                                                                                                                                                                                                                                                                                                                                                                                  |
| <b>Other information</b> |     |                                                                                                                                                                                                                                                                                                                                                                                                                                                  |
| Funding                  | 22  | Give the source of funding and the role of the funders for the present study and, if applicable, for the original study on which the present article is based <b>DONE</b>                                                                                                                                                                                                                                                                        |

**Additionally, if you haven't done so already, please upload with your revision:**

- **signed copyright forms from each author**  
DONE
- **completed ICMJE forms from any author with competing interests to declare (in the absence of a completed form, we'll assume the author has no competing interests; this information will be added to the published version of the manuscript)**  
DONE
- **editable figure files --Figures 1 and 3-5 should be editable Excel files; if that's not possible, please supply as emf or wmf --Figure 2 should be an editable PowerPoint file**  
DONE – however, we prepared figure 2 in InkScape – and this has proven very difficult to convert to powerpoint. We can, however, convert this easily to Adobe Illustrator, and hope that this is acceptable.
