# Supplementary material
Source: PubMed Central journal article supplement (PMC5378506)
Supplement: supp_5.1.E255_2016-0142_original_submission.pdf [file supp_5.1.E255_2016-0142_original_submission.pdf]

# Comprehensive analysis of household radon gas levels and risk factors in Southern Alberta

Fintan K. T. Stanley, BSc, Siavash Zarezadeh, Colin D. Dumais, BSc, Karin Dumais, BSc, Renata MacQueen, Fiona Clement, PhD, Aaron A. Goodarzi, PhD\*

## Author Affiliations:

Robson DNA Science Centre, Arnie Charbonneau Cancer Institute, Departments of Biochemistry & Molecular Biology and Oncology, Cumming School of Medicine, University of Calgary, Calgary, Alberta, Canada (Stanley, Zarezadeh, Goodarzi); Canadian Association of Radon Scientists and Technologists, Calgary, Alberta, Canada (Dumais, Dumais, MacQueen); Health Technology Assessment Unit, O'Brien Institute for Public Health, Department of Community Health Sciences, Cumming School of Medicine, University of Calgary, Calgary, Alberta, Canada (Clement).

\*Correspondence to: Aaron Goodarzi, [A.Goodarzi@ucalgary.ca](mailto:A.Goodarzi@ucalgary.ca)

The AAG laboratory is supported by the Canadian Institutes of Health Research. AAG is currently the Canada Research Chair for Genome Damage and Instability Disease and this work was undertaken, in part, thanks to funding from the Canada Research Chairs program. *We declare no competing interests.*

## ABSTRACT

**Background:** Radon ( $^{222}\text{Rn}$ ) gas is a naturally occurring radioactive isotope arising from uranium decay in soil and bedrock, escaping and often concentrating in indoor air. Radon undergoes radioactive disintegration, precipitating as solid radioisotopes and emitting cancer-causing alpha particles. The inhalation of radon exposes lung tissue to alpha particle bombardment, a highly mutagenic form of ionizing radiation that damages DNA and increases the lifetime risk of lung cancer by 16% per 100 Bq/m<sup>3</sup>. **Methods:** In this study, we analyzed household radon concentrations and risk factors in the greater metropolitan area of Calgary, the 3<sup>rd</sup> largest Canadian metropolis. **Results:** 2,382 households were tested between 2013-2016, with an average indoor air reading of 126 Bq/m<sup>3</sup> radon, equating to an effective absorbed radiation dose of 3.2 mSv/yr. 48% of households were  $\geq 100$  Bq/m<sup>3</sup> and 12.4% were  $\geq 200$  Bq/m<sup>3</sup>, with homes measuring as low as  $<15$  Bq/m<sup>3</sup> and as high as 3,441 Bq/m<sup>3</sup>. Maximum observed radon concentrations were 3-fold higher in properties built in the past 25 years compared to older homes, suggesting that modern building practices are increasing indoor air radon accumulation. Health economic analysis suggest that lung cancers associated with high indoor radon levels cost the regional economy \$17 million annually in direct and indirect medical costs. **Interpretation:** This work demonstrates that radon is a genuine public health concern in Southern Alberta, legitimizes efforts to understand the consequences of radon exposure to the public, and suggest that radon testing and mitigation is likely to be an impactful cancer prevention strategy.

1  
2  
3  
4  
5  
6  
7  
8  
9  
10  
11  
12  
13  
14  
15  
16  
17  
18  
19  
20  
21  
22  
23  
24  
25  
26  
27  
28  
29  
30  
31  
32  
33  
34  
35  
36  
37  
38  
39  
40  
41  
42  
43  
44  
45  
46  
47  
48  
49  
50  
51  
52  
53  
54  
55  
56  
57  
58  
59  
60

**KEYWORDS:**

Radon, Radiation, Cancer, Air Quality, Lung Cancer, Calgary, Alberta, Canada, Building Practice, Home Age, Home Size, Alpha Particle, DNA damage

Confidential

## INTRODUCTION

Radon ( $^{222}\text{Rn}$ ) gas is formed naturally by the radioactive decay of radium, thorium and uranium-bearing soils and bedrocks, and is prevalent in the North American Prairies. Radon gas permeates under high pressure through the soil towards low or negative pressure areas such as basements and cellars. In winter, radon is actively drawn up as homes are heated and thermal stack effects (hot air rises) generates pressure differentials that draw upon foundations. Poorly-ventilated and well-insulated homes can experience profound radon buildup. Radon inhalation is the single greatest source of lifetime radiation exposure<sup>1</sup> and is estimated to be responsible for 2% of all cancer deaths<sup>2</sup>. High radon also correlates with increased rates of myeloid leukemia, melanoma, kidney cancers and certain childhood cancers<sup>3,4</sup>. Atomic  $^{222}\text{Rn}$  has a half-life of 3.8 days, with 50% decaying in that time to solid radioactive polonium and emitting alpha ( $\alpha$ ) particle radiation, which is, dose-for-dose, substantially more dangerous to health than x- or  $\gamma$ -rays<sup>5,6</sup>. Radon decay within lungs leads to  $\alpha$ -particle bombardment of tissue and precipitation of solid polonium within lung mucosal linings. These decay products emit another 3x  $\alpha$ -particles and 2x  $\beta$ -particles before becoming solid  $^{210}\text{Pb}$  (Lead). Precipitated polonium attached to household dust can also be inhaled<sup>3</sup>. Alpha particles carry enough energy to dislodge electrons from other molecules, leading to ionization. Human DNA is easily ionized by  $\alpha$ -particles, and will break apart as they travel through tissue, generating difficult-to-repair DNA damage that has a significantly higher dose effect than  $\gamma$ -rays<sup>5-7</sup>. DNA damage leads to genetic mutation that increases cancer risks with each new  $\alpha$ -particle emission.

Radiation is measured in Becquerels (Bq) that equal one radioactive decay event per second. Radon concentrations in air are captured as  $\text{Bq}/\text{m}^3$  with  $100 \text{ Bq}/\text{m}^3$  increasing lifetime lung cancer risk by 16%<sup>8</sup>. Health Canada indicates that  $200 \text{ Bq}/\text{m}^3$  represents the maximum acceptable amount before certain and serious health risks. For context, a year of inhaling  $200 \text{ Bq}/\text{m}^3$  radon is the radiation exposure equivalent of 500 dental x-rays. Anyone chronically inhaling radon gas between age 0-65 is at risk of lung cancer in their lifetime, with children and teens most at risk<sup>2,9-11</sup>. Globally, 25% of lung cancer patients are non-smokers, with most cases in developed countries caused directly by radon inhalation in homes and workplaces<sup>12-14</sup>. 2,150

1  
2  
3 Albertans are diagnosed with lung cancer yearly, with mortality at 1,610 deaths/year. Cancer  
4 prevention is preferable to the physical, emotional, social and economic cost of cancer  
5 diagnosis and therapy. In the case of radon, exposure is uncomplicated by addiction and  
6 prevention represents an effective way to reduce cancer burden. Motivated by this, our  
7 objective was to measure household radon levels and correlate these with home metrics in the  
8 greater Calgary metropolitan area, the third most populous urban area in Canada.  
9  
10  
11  
12  
13  
14  
15  
16  
17

## 18 **METHODS**

19  
20  
21 **DATA COLLECTION** - From October 2013 to January 2016, ~3,000 homeowners in the greater  
22 metropolitan area of Calgary purchased 'alpha track' radon detectors (\$45/unit) as part of a  
23 study entitled the "Citizen Scientist Radon Testing Project". Outreach to the general public was  
24 achieved through print, online and TV/radio media. Participants consented to long term  
25 average radon readings and home metrics to be provided to researchers in a semi-anonymous  
26 manner, with data only associated with their postal region. The survey collected foundation  
27 type, construction year and room of deployment. 80% tests (n = 2,382) were returned and  
28 eligible for analysis. The remaining tests were either not deployed during the appropriate  
29 testing window or, for a small minority, spoiled by homeowner error. Rigorous care was taken  
30 to educate participants in the correct test deployment methods through personal  
31 communication with C-NRPP (*Canadian National Radon Protection Program*)-certified  
32 professionals, online video demonstrations and phone-calls. Radon tests were closed passive  
33 etched track detectors made from CR-39 plastic film inside an antistatic holder (Radtrak2,  
34 Landauer Radon, Inc., Glenwood, IL, USA) and enclosed in housing composed of electrically  
35 conductive material with filtered openings to permit gas diffusion, with a typical linear range of  
36 15 Bq/m<sup>3</sup> to 25,000 Bq/m<sup>3</sup>. To be read, CR-39's are etched in 5.5N NaOH at 70°C for 15.5 min  
37 and counted automatically using TrackEtch<sup>®</sup> software at Landauer laboratories in the USA (ISO  
38 17025 certified). Labs and detectors are C-NRPP accredited to carry out alpha track device  
39 analysis. Controls submitted to the lab included duplicates to ensure device reproducibility,  
40 spiked positives (to ensure accuracy) and non-deployed negatives (controlling for transport and  
41  
42  
43  
44  
45  
46  
47  
48  
49  
50  
51  
52  
53  
54  
55  
56  
57  
58  
59  
60

1  
2  
3 storage prior to analysis). All readings were calculated in Bq/m<sup>3</sup> rounded to the nearest whole  
4 number and are represented as such throughout this study. The 'greater metropolitan area' of  
5 Calgary, included the entire City of Calgary and towns/hamlets of Cochrane, Okotoks, Airdrie,  
6 Canmore, Bragg Creek, Chestermere, High River, De Winton, Redwood Meadows and  
7 surrounding rural 'municipal districts'. There were a total of 2,018 homes within Calgary city  
8 limits and 364 in surrounding townships. Commercial buildings, apartment blocks and mobile  
9 homes were excluded. Single Family detached homes represented the overwhelming majority  
10 of properties tested (n = 1,819). The median test duration was 103 days and >99.5% of were  
11 deployed from October-April, as recommended by national and international agencies.  
12  
13  
14  
15  
16  
17  
18  
19  
20

## 21 22 23 RESULTS

24  
25  
26  
27 **OVERALL HOUSEHOLD RADON LEVELS IN THE CALGARY METROPOLITAN AREA** - The indoor air  
28 radon levels for each home, grouped by postal code district, are shown in **Figure 1**. The average  
29 reading across all tests in the region was 126 Bq/m<sup>3</sup>, with a minimum reading of <15 Bq/m<sup>3</sup> and  
30 maximum of 3,441 Bq/m<sup>3</sup>. **Figure 2** shows a map of radon readings by geographical subdivision.  
31 While some regions trended slightly higher on average than others, there were no areas with  
32 uniformly low household radon levels. All areas monitored contained homes with high radon  
33 well above the national action level. The townships of Cochrane and Okotoks/High River  
34 displayed highest average household radon readings, at 261 Bq/m<sup>3</sup> for Cochrane and 194 Bq/m<sup>3</sup>  
35 for Okotoks/High River. The City of Calgary itself averaged at 122 Bq/m<sup>3</sup>, ranging from 72-164  
36 Bq/m<sup>3</sup> between smaller districts within city limits. These variances are relatively small, and we  
37 conclude that since exceptionally high radon readings have been observed all across the region,  
38 there are no guaranteed 'safe' areas and all neighborhoods are potentially at risk.  
39  
40  
41  
42  
43  
44  
45  
46  
47  
48  
49

50  
51  
52 **RELATIVE RISKS COMPARED TO CANADIAN AVERAGES** - The *Cross-Canada Survey of Radon*  
53 *Concentrations in Homes*<sup>15</sup>, most recently updated in 2012, determined that 6.9% of all  
54 Canadian homes exceeded 200 Bq/m<sup>3</sup>. For the Calgary Health Region, based on a sample size of  
55 86 homes that survey indicated that 8.1% of homes exceeded 200 Bq/m<sup>3</sup>, with no homes  
56  
57  
58  
59  
60

1  
2  
3 exceeding 600 Bq/m<sup>3</sup>. Our data, based on 2,382 readings in the same region, reveals that 12.4%  
4 of homes are ≥200 Bq/m<sup>3</sup> with 1% of homes ≥600 Bq/m<sup>3</sup>. The percentage of homes exceeding  
5 200 Bq/m<sup>3</sup> in townships surrounding Calgary is greater, at 17% on average, with Okotoks/High  
6 River (27%) and Cochrane (25%) being the highest. This indicates that Southern Albertan homes  
7 contain radon levels far higher than Canada as a whole, bringing the percentage of Albertan  
8 homes ≥200 Bq/m<sup>3</sup> in line with estimates for Manitoba (19%) and Saskatchewan (9%)<sup>15</sup>. The  
9 2015 population of the City of Calgary was 1.23 million, with ~200,000 people in surrounding  
10 townships. Census data estimates this area to contain 463,682 single family residences and, so,  
11 the 12.4% of homes exceeding 200 Bq/m<sup>3</sup> equates with ~57,500 homes or, taking into account  
12 the average occupants per household (2.6), roughly 150,000 residents - a substantial population  
13 whose lifetime risk of lung cancer is increased by an avoidable health risk. This also indicates  
14 that the percentage of population at risk from radon (12.4%) is comparable to those at risk of  
15 tobacco-related cancer, as smoking rates in Alberta are 19%<sup>16</sup>.  
16  
17  
18  
19  
20  
21  
22  
23  
24  
25  
26  
27  
28  
29

30 **RADON LEVELS BY HOME AGE AND ENGINEERING FEATURES** - The home metrics survey  
31 distributed with detectors allowed us to examine factors that associated with high radon levels  
32 (**Table 1**). The strongest correlation was with date of home construction, with newer homes  
33 trending towards higher readings. An independent-sample t-test indicated that radon levels  
34 were higher in houses built in the last 25 years (mean 142 Bq/m<sup>3</sup>, n=995) than homes built  
35 before 1992 (mean 108 Bq/m<sup>3</sup>, n=1,134), with a statistically significant difference of 34 Bq/m<sup>3</sup>±  
36 7[mean ± standard error],  $t(2127) = 4.9, p < 0.001$ . One way ANOVAs were carried out to test for  
37 potential associations between home metrics and radon readings, unreported sets were  
38 excluded. Based on Bonferroni post-hoc testing, tests carried out in basements demonstrated  
39 significantly ( $p \leq 0.001$ ) higher radon vs those conducted at ground or 1<sup>st</sup> floors; tests carried  
40 out in utility spaces were also more like to be higher compared to living spaces ( $p < 0.001$ )  
41 (**Figure 3**). This suggests that individuals occupying basement-suites (common practice in the  
42 region) are especially at risk.  
43  
44  
45  
46  
47  
48  
49  
50  
51  
52  
53  
54  
55  
56  
57  
58  
59  
60

1  
2  
3  
4  
5  
6  
7  
8  
9  
10  
11  
12  
13  
14  
15  
16  
17  
18  
19  
20  
21  
22  
23  
24  
25  
26  
27  
28  
29  
30  
31  
32  
33  
34  
35  
36  
37  
38  
39  
40  
41  
42  
43  
44  
45  
46  
47  
48  
49  
50  
51  
52  
53  
54  
55  
56  
57  
58  
59  
60

**Figure 4A** shows all homes across the region measuring  $\geq 200$  Bq/m<sup>3</sup> separated into those built within the past 25 years (1992-2016) and earlier (1890-1991). A striking increase in the maximum observed radon levels is evident for newer homes, suggesting that millennial building, insulation and/or ventilation practices are creating indoor air environments that accumulate radon to higher levels compared to homes built through most of the 20<sup>th</sup> century. This could be due to:

- (i) **Energy-efficient home insulation** practices have improved substantially in the past 25 years, reducing heat-loss but also suppressing overall indoor and outdoor air exchange. Indeed, increasing the air-tightness increases home mean radon concentrations by 56.6%<sup>17</sup>. In newer homes with the energy efficient insulation and no additional ventilation to compensate, maximum radon levels are expected to rise to substantially higher levels.
- (ii) **Home floor plan sizes** in Canada have steadily increased over time. Since concrete contracts as it dries in a fixed ratio with the overall size of the slab being poured<sup>18,19</sup>, larger floor plans equate with a greater net shrinkage around the perimeter and, consequently, a larger floor-to-foundation gaps, enabling more radon to enter. This is likely exacerbated by the fact that the overall concrete shrinkage has increased significantly in the past 25 years, reportedly due to a scarcity of good quality aggregates and subsequent use of recycled aggregates and higher mineral additives (such as fly ash)<sup>20</sup>. An unbiased survey of 1,632 Calgary metropolitan area homes listed for sale in the summer of 2016 demonstrates that average floor plans have doubled over the past 65 years (**Figure 4B-C**). Plotting reported home ft<sup>2</sup> values by construction year indicates a clear trend towards larger floor plans, with those built from 1992-2016 being an average 2,384.9 ft<sup>2</sup> (n = 914 homes), 51% (806 ft<sup>2</sup>) larger than homes built in the previous 90 years (1,578.9 ft<sup>2</sup> on average, n = 725).
- (iii) **Ceiling height and the number of floors** in homes has also increased over time, with vaulted two-story ceilings and three-level homes becoming the norm in the region in the past 25 years. Loftier homes, just like tall chimneys, demonstrate greater thermal stacking and pull air from lower levels with exceptional power. Roof-top vents and open upper-floor windows will exacerbate this effect, especially if lower floor vents, windows and doors are obstructed or closed, leading to poor air-intake. Heating tall homes creates more potent thermal stack

1  
2  
3 effects generating powerful negative pressures at basement level that draw up ever more  
4 soil gas (radon) into the indoor air.  
5  
6  
7

8  
9 **INDOOR RADON LEVELS PRE- AND POST-MITIGATION** - We also collected data from  
10 households that were  $\geq 200$  Bq/m<sup>3</sup> and opted for mitigation, to understand how effective these  
11 procedures are at reducing radon in the region (**Figure 5**). Most mitigations involved sub-slab  
12 depressurization, with a minority utilizing radon-impermeable membrane installation. Of 90  
13 homes averaging 575 Bq/m<sup>3</sup> before mitigation, radon suppression successfully reduced levels to  
14 an average of 32.5 Bq/m<sup>3</sup> (max = 88 Bq/m<sup>3</sup>; min = 7 Bq/m<sup>3</sup>). The most striking case was the  
15 home at 3,441 Bq/m<sup>3</sup> that was successfully reduced to 86 Bq/m<sup>3</sup> – a 97.5% reduction. When  
16 viewed by percentages, mitigation typically achieved a 92% radon reduction. Thus, we conclude  
17 that for the greater Calgary metropolitan area, radon mitigation is generally extremely  
18 effective. We speculate that this is due to the porous gravel that lies beneath most homes in  
19 the region, enabling soil gas flow across foundations to mitigation devices. It is worth noting  
20 that homes that rest upon less permeable, compacted clay may not be so amenable to radon  
21 mitigation.  
22  
23  
24  
25  
26  
27  
28  
29  
30  
31  
32  
33  
34

35 **THE ECONOMIC COST OF RADON** - Radon is an avoidable cause of a cancer type with serious  
36 economic consequences to health care systems, individuals and society. 2,150 new cases of  
37 lung cancer are diagnosed annually in Alberta and ~358 of those are never-smokers whose  
38 tumors are thought to be overwhelmingly attributed to radon. This is a conservative estimate,  
39 as some smoking-related cancers may also be attributed or worsened by radon exposure. The  
40 direct costs paid by the healthcare system for one case of lung cancer in Alberta are estimated  
41 to be \$24,055/person<sup>21</sup>. Hence, the total direct cost of radon-induced lung cancer in Alberta is  
42 approximately \$8,600,000/yr. Indirect costs of lung cancer in Alberta are unknown; however,  
43 other studies have estimated that, including lost productivity, informal care-giving and other  
44 costs borne outside the healthcare system, indirect costs are at least as much as direct costs<sup>22</sup>.  
45 Hence, when these are factored in, then total costs of radon-induced lung cancer to Alberta are  
46 estimated to be at least \$17 million per year. If one also takes into account local annual  
47  
48  
49  
50  
51  
52  
53  
54  
55  
56  
57  
58  
59  
60



1  
2  
3 inflation rate of 1-2% across a 10 year period<sup>23</sup>, then universal radon protection has the  
4 potential in a decade to return \$177-186 million to provincial economy, with \$89-93 million  
5 being returned directly to the healthcare system.  
6  
7  
8  
9

## 10 11 **INTERPRETATION**

12  
13  
14  
15 ***STRENGTHS and LIMITATIONS*** - This work represents one of the largest municipal studies of  
16 household radon in Canadian history, and has analyzed household radon levels not only by  
17 region (the historic norm for previous work<sup>15</sup>) but correlates radon levels with specific  
18 Canadian-built home metrics. While our data has statistical power with >2,000 data points  
19 within the city limits of Calgary, one limitation of our work we only have 364 data points in the  
20 surrounding smaller communities, and those areas will require further surveying in the future  
21 to improve the power of our findings. For some of the self-reported home metric data points  
22 within our survey, we fell short of 100% response rate, with an average 89% (lowest 85%) of  
23 desired information returned. Our work focused entirely on residences of a non-commercial  
24 nature and, in future years, it will be important to expand this analysis to encompass daycares,  
25 workplaces, etc. Nevertheless, our work represents the first major systematic examination of  
26 radon with community-level resolution for a major Canadian city.  
27  
28  
29  
30  
31  
32  
33  
34  
35  
36  
37  
38  
39

40 ***RADON and RADIATION DOSAGES*** - In this study, we report radon concentrations in Bq/m<sup>3</sup>, a  
41 measure of radioactive decay events. However, absorbed radioactive energy dose is measured  
42 typically by the Sievert (Sv), a weighted measure of radiation absorption by tissue, and factors  
43 in radiation quality and relative health risk. The ICRP (*International Commission on Radiological*  
44 *Protection*) uses an epidemiological approach to estimate radon exposure effects using risk  
45 estimates from uranium miner and A-bomb survivor studies. Based on this, 100 Bq/m<sup>3</sup> radon  
46 equates with 1.72 mSv/yr<sup>24</sup>. Other complex models take into account physical factors such as  
47 radon decay product exposure and physiological factors such as breathing. According to  
48 UNSCEAR (*United Nations Scientific Committee on the Effects of Atomic Radiation*) 100 Bq/m<sup>3</sup>  
49 equates to a 2.5 mSv/yr dose absorbed by adult lungs<sup>25</sup>. If we apply these to our most extreme  
50  
51  
52  
53  
54  
55  
56  
57  
58  
59  
60

1  
2  
3 case (3,441 Bq/m<sup>3</sup>), occupants of that household received 59.2 mSv (ICRP model) to 86 mSv  
4 (UNSCEAR model) of  $\alpha$ -radiation per year, equivalent to 6,000 dental x-rays and exceeding  
5 Canadian maximum limit for nuclear energy workers (100 mSv in 5 years) in 14-20 months.  
6  
7  
8

9  
10  
11 **RADON and RADIATION QUALITY** - Radiation 'quality' is also important to consider as  $\alpha$ -  
12 particles are much more densely ionizing versus x-rays. Established systems<sup>7</sup> to estimate  
13 biological effects of different radiation qualities weight electromagnetic radiation (such as X-  
14 rays,  $\gamma$ -rays) as 1X dose equivalent and particle radiation (i.e.  $\alpha$ -particles) at 20X. Radiobiologists  
15 estimate that 50 mSv of ionizing radiation produces approximately one DNA double-strand  
16 break (DSB) per cell, an event capable of shearing entire chromosomes and promoting cancer-  
17 causing mutations. A typical pair of adult human lungs is lined by 56 billion alveolar type I/II  
18 cells and 68 billion epithelial cells, the cells most exposed to radon<sup>26</sup>. If we consider an indoor  
19 air radon level of 200 Bq/m<sup>3</sup>, equivalent to 3.44 mSv/yr using the *most conservative* estimate  
20 discussed above, then that equates with approximately 1 DSB for every 15 cells or, when on the  
21 scale of all lung alveoli cells, at least 7.36 billion DSBs per person. Even assuming that 90% of  
22 DSBs are repaired without causing genetic errors, then that means a minimum of 736 million  
23 genetic mutations per lung will occur per year in a person inhaling 200 Bq/m<sup>3</sup> radon. Thus, it is  
24 easy to see how, biologically, the difference between 199 Bq/m<sup>3</sup> and 200 Bq/m<sup>3</sup> is insignificant.  
25  
26  
27  
28  
29  
30  
31  
32  
33  
34  
35  
36  
37  
38  
39  
40  
41  
42  
43  
44  
45  
46  
47  
48  
49  
50  
51  
52  
53  
54  
55  
56  
57  
58  
59  
60  
61  
62  
63  
64  
65  
66  
67  
68  
69  
70  
71  
72  
73  
74  
75  
76  
77  
78  
79  
80  
81  
82  
83  
84  
85  
86  
87  
88  
89  
90  
91  
92  
93  
94  
95  
96  
97  
98  
99  
100  
101  
102  
103  
104  
105  
106  
107  
108  
109  
110  
111  
112  
113  
114  
115  
116  
117  
118  
119  
120  
121  
122  
123  
124  
125  
126  
127  
128  
129  
130  
131  
132  
133  
134  
135  
136  
137  
138  
139  
140  
141  
142  
143  
144  
145  
146  
147  
148  
149  
150  
151  
152  
153  
154  
155  
156  
157  
158  
159  
160  
161  
162  
163  
164  
165  
166  
167  
168  
169  
170  
171  
172  
173  
174  
175  
176  
177  
178  
179  
180  
181  
182  
183  
184  
185  
186  
187  
188  
189  
190  
191  
192  
193  
194  
195  
196  
197  
198  
199  
200  
201  
202  
203  
204  
205  
206  
207  
208  
209  
210  
211  
212  
213  
214  
215  
216  
217  
218  
219  
220  
221  
222  
223  
224  
225  
226  
227  
228  
229  
230  
231  
232  
233  
234  
235  
236  
237  
238  
239  
240  
241  
242  
243  
244  
245  
246  
247  
248  
249  
250  
251  
252  
253  
254  
255  
256  
257  
258  
259  
260  
261  
262  
263  
264  
265  
266  
267  
268  
269  
270  
271  
272  
273  
274  
275  
276  
277  
278  
279  
280  
281  
282  
283  
284  
285  
286  
287  
288  
289  
290  
291  
292  
293  
294  
295  
296  
297  
298  
299  
300  
301  
302  
303  
304  
305  
306  
307  
308  
309  
310  
311  
312  
313  
314  
315  
316  
317  
318  
319  
320  
321  
322  
323  
324  
325  
326  
327  
328  
329  
330  
331  
332  
333  
334  
335  
336  
337  
338  
339  
340  
341  
342  
343  
344  
345  
346  
347  
348  
349  
350  
351  
352  
353  
354  
355  
356  
357  
358  
359  
360  
361  
362  
363  
364  
365  
366  
367  
368  
369  
370  
371  
372  
373  
374  
375  
376  
377  
378  
379  
380  
381  
382  
383  
384  
385  
386  
387  
388  
389  
390  
391  
392  
393  
394  
395  
396  
397  
398  
399  
400  
401  
402  
403  
404  
405  
406  
407  
408  
409  
410  
411  
412  
413  
414  
415  
416  
417  
418  
419  
420  
421  
422  
423  
424  
425  
426  
427  
428  
429  
430  
431  
432  
433  
434  
435  
436  
437  
438  
439  
440  
441  
442  
443  
444  
445  
446  
447  
448  
449  
450  
451  
452  
453  
454  
455  
456  
457  
458  
459  
460  
461  
462  
463  
464  
465  
466  
467  
468  
469  
470  
471  
472  
473  
474  
475  
476  
477  
478  
479  
480  
481  
482  
483  
484  
485  
486  
487  
488  
489  
490  
491  
492  
493  
494  
495  
496  
497  
498  
499  
500  
501  
502  
503  
504  
505  
506  
507  
508  
509  
510  
511  
512  
513  
514  
515  
516  
517  
518  
519  
520  
521  
522  
523  
524  
525  
526  
527  
528  
529  
530  
531  
532  
533  
534  
535  
536  
537  
538  
539  
540  
541  
542  
543  
544  
545  
546  
547  
548  
549  
550  
551  
552  
553  
554  
555  
556  
557  
558  
559  
560  
561  
562  
563  
564  
565  
566  
567  
568  
569  
570  
571  
572  
573  
574  
575  
576  
577  
578  
579  
580  
581  
582  
583  
584  
585  
586  
587  
588  
589  
590  
591  
592  
593  
594  
595  
596  
597  
598  
599  
600  
601  
602  
603  
604  
605  
606  
607  
608  
609  
610  
611  
612  
613  
614  
615  
616  
617  
618  
619  
620  
621  
622  
623  
624  
625  
626  
627  
628  
629  
630  
631  
632  
633  
634  
635  
636  
637  
638  
639  
640  
641  
642  
643  
644  
645  
646  
647  
648  
649  
650  
651  
652  
653  
654  
655  
656  
657  
658  
659  
660  
661  
662  
663  
664  
665  
666  
667  
668  
669  
670  
671  
672  
673  
674  
675  
676  
677  
678  
679  
680  
681  
682  
683  
684  
685  
686  
687  
688  
689  
690  
691  
692  
693  
694  
695  
696  
697  
698  
699  
700  
701  
702  
703  
704  
705  
706  
707  
708  
709  
710  
711  
712  
713  
714  
715  
716  
717  
718  
719  
720  
721  
722  
723  
724  
725  
726  
727  
728  
729  
730  
731  
732  
733  
734  
735  
736  
737  
738  
739  
740  
741  
742  
743  
744  
745  
746  
747  
748  
749  
750  
751  
752  
753  
754  
755  
756  
757  
758  
759  
760  
761  
762  
763  
764  
765  
766  
767  
768  
769  
770  
771  
772  
773  
774  
775  
776  
777  
778  
779  
780  
781  
782  
783  
784  
785  
786  
787  
788  
789  
790  
791  
792  
793  
794  
795  
796  
797  
798  
799  
800  
801  
802  
803  
804  
805  
806  
807  
808  
809  
810  
811  
812  
813  
814  
815  
816  
817  
818  
819  
820  
821  
822  
823  
824  
825  
826  
827  
828  
829  
830  
831  
832  
833  
834  
835  
836  
837  
838  
839  
840  
841  
842  
843  
844  
845  
846  
847  
848  
849  
850  
851  
852  
853  
854  
855  
856  
857  
858  
859  
860  
861  
862  
863  
864  
865  
866  
867  
868  
869  
870  
871  
872  
873  
874  
875  
876  
877  
878  
879  
880  
881  
882  
883  
884  
885  
886  
887  
888  
889  
890  
891  
892  
893  
894  
895  
896  
897  
898  
899  
900  
901  
902  
903  
904  
905  
906  
907  
908  
909  
910  
911  
912  
913  
914  
915  
916  
917  
918  
919  
920  
921  
922  
923  
924  
925  
926  
927  
928  
929  
930  
931  
932  
933  
934  
935  
936  
937  
938  
939  
940  
941  
942  
943  
944  
945  
946  
947  
948  
949  
950  
951  
952  
953  
954  
955  
956  
957  
958  
959  
960  
961  
962  
963  
964  
965  
966  
967  
968  
969  
970  
971  
972  
973  
974  
975  
976  
977  
978  
979  
980  
981  
982  
983  
984  
985  
986  
987  
988  
989  
990  
991  
992  
993  
994  
995  
996  
997  
998  
999  
1000

## CONCLUSION

Southern Alberta is a region of high geologic radon potential and home to ~1.4 million people, including Calgary, the 3<sup>rd</sup> largest Canadian census district<sup>27</sup>. Approximately 2,000 Albertans are diagnosed with lung cancer annually and 1 in 4 diagnoses are in never-smokers<sup>12,28</sup>. We demonstrate that 48% of 2,382 of greater Calgary metropolitan area homes contain indoor air

radon above 100 Bq/m<sup>3</sup>; 12.4% exceeded 200 Bq/m<sup>3</sup>, the maximum acceptable limit and recommended action level in Canada. Homes built in the past 25 years have significantly higher radon compared to older homes. This study shows that radon – an established and potent carcinogen – is of genuine concern in Southern Alberta, and legitimizes efforts to understand the consequences of exposure to public health. Our findings suggest that radon awareness, testing and mitigation is likely to be an impactful cancer prevention strategy.

## FIGURE and TABLE LEGENDS

**Figure 1. Indoor air radon concentrations by postal code district in the greater Calgary metropolitan area.** 2,382 individual home readings for indoor air radon are grouped by the first three digits of Canadian postal code. Darker coloured circles indicate multiple overlapping radon readings. High radon concentrations are documented almost universally across the region. (1.Airdrie East, 2.Canmore, 3.Central Foothills, 4.Cochrane, 5. High River, 6. Kananaskis Improvement District, 7. Okotoks, 8. Redwood Meadows, 9. Chestermere, 10. Symons Valley.

**Figure 2. Average indoor air radon concentrations by subdivision of the greater Calgary metropolitan area.** The percentage of homes between 0-100 Bq/m<sup>3</sup>, 100-200 Bq/m<sup>3</sup> or >200 Bq/m<sup>3</sup> for the four quadrants of Calgary and the surrounding towns, including number of homes tested in each region. Max = maximum observed radon reading in area; Min = minimum observed radon reading in area. In all cases, homes well above the maximum acceptable limit (200 Bq/m<sup>3</sup>) for Canada are documented.

**Figure 3. Average indoor air radon concentrations by home features.** Box plots showing min/max spread and mean of indoor air radon tests within home descriptor groupings (\* $p \leq 0.001$ , Bonferroni Post hoc testing on one-way ANOVAs).

**Figure 4. Maximum observed household air radon concentrations are significantly higher in homes built in the past 25 years.** (A) Indoor air radon measured in homes built between 1992 and 2016 versus 1991 and earlier. (B) The reported square footage of homes constructed between 1945 and 2016. (C) Average home square footages across decades.

Figure 5. Pre- and post-mitigation household air radon concentrations for all homes initially measuring  $\geq 200$  Bq/m<sup>3</sup>. Red bars indicate radon levels prior to mitigation. Blue bars are the corresponding post-mitigation radon level for that same household.

Table1: Radon levels by home metrics. 2,382 household air radon readings grouped according to reported building metrics with average indoor air radon concentrations, error of the mean, and range.

## REFERENCES

1. Schauer DA & Linton OW. NCRP Report No. 160, Ionizing Radiation Exposure of the Population of the United States, medical exposure--are we doing less with more, and is there a role for health physicists? *Health Phys* **97**, 1-5 (2009).
2. Darby S, Hill D, Auvinen A et al. Radon in homes and risk of lung cancer: collaborative analysis of individual data from 13 European case-control studies. *Brit. Med. J.* **330**, 223 (2005).
3. Henshaw DL, Eatough JP & Richardson RB. Radon as a causative factor in induction of myeloid leukaemia and other cancers. *Lancet* **335**, 1008-12 (1990).
4. Marsh JW & Bailey MR. A review of lung-to-blood absorption rates for radon progeny. *Radiat Prot Dosimetry* **157**, 499-514 (2013).
5. Edwards AA, Purrott RJ, Prosser JS et al. The induction of chromosome aberrations in human lymphocytes by alpha-radiation. *Int J Radiat Biol Relat Stud Phys Chem Med* **38**, 83-91 (1980).
6. Little JB, Kennedy AR & McGandy RB. Effect of dose rate on the induction of experimental lung cancer in hamsters by alpha radiation. *Radiat Res* **103**, 293-9 (1985).
7. The 2007 Recommendations of the International Commission on Radiological Protection. ICRP publication 103. *Ann ICRP* **37**, 1-332 (2007).
8. World Health Organization. *WHO handbook on indoor radon : a public health perspective*, xiv, 94 p. (World Health Organization, Geneva, Switzerland, 2009).
9. Lubin JH, Boice JD, Jr., Edling C et al. Lung cancer in radon-exposed miners and estimation of risk from indoor exposure. *J Natl Cancer Inst* **87**, 817-27 (1995).
10. Krewski D, Lubin JH, Zielinski JM et al. Residential radon and risk of lung cancer: a combined analysis of 7 North American case-control studies. *Epidemiology* **16**, 137-45 (2005).
11. Chen J. Canadian lung cancer relative risk from radon exposure for short periods in childhood compared to a lifetime. *Int J Environ Res Public Health* **10**, 1916-26 (2013).
12. Parkin DM, Bray F, Ferlay J et al. Global cancer statistics, 2002. *CA Cancer J Clin* **55**, 74-108 (2005).
13. Darby S, Hill D, Deo H et al. Residential radon and lung cancer--detailed results of a collaborative analysis of individual data on 7148 persons with lung cancer and 14,208 persons without lung cancer from 13 epidemiologic studies in Europe. *Scand J Work Environ Health* **32 Suppl 1**, 1-83 (2006).
14. Chen J. A Review of Radon Doses. *Radiation Protection Management* **22**, 27-31 (2005).
15. Health Canada. *Cross-Canada Survey of Radon Concentrations in Homes - Final Report*, 29 (Government of Canada, Ottawa, Ontario, 2012).
16. Health Indicators. in *CANSIM* Vol. 82-221-X (ed. StatsCan) (Government of Canada, 2016).
17. Milner J, Shrubsole C, Das P et al. Home energy efficiency and radon related risk of lung cancer: modelling study. *Brit. Med. J.* **348**, f7493 (2014).

- 1
  - 2
  - 3
  - 4
  - 5
  - 6
  - 7
  - 8
  - 9
  - 10
  - 11
  - 12
  - 13
  - 14
  - 15
  - 16
  - 17
  - 18
  - 19
  - 20
  - 21
  - 22
  - 23
  - 24
  - 25
  - 26
  - 27
  - 28
  - 29
  - 30
  - 31
  - 32
  - 33
  - 34
  - 35
  - 36
  - 37
  - 38
  - 39
  - 40
  - 41
  - 42
  - 43
  - 44
  - 45
  - 46
  - 47
  - 48
  - 49
  - 50
  - 51
  - 52
  - 53
  - 54
  - 55
  - 56
  - 57
  - 58
  - 59
  - 60
18. Videla CC, Carreira DJ, Garner NJ et al. Guide for Modeling and Calculating Shrinkage and Creep in Hardened Concrete. Vol. ACI 209.2R-08 (American Concrete Institute, Farmington Hills, MI, 2008).
19. Gilbert RI. Shrinkage, Cracking and Deflection-the Serviceability of Concrete Structures. *Electronic Journal of Structural Engineering* **1**, 2-14 (2001).
20. Silva RV, deBrito J & Dhir RK. Prediction of the shrinkage behavior of recycled aggregate concrete: A review. *Construction and Building Materials* **77**, 327-339 (2015).
21. Low dose computed tomography for the screening of lung cancer in adults. (Institute of Health Economics Edmonton AB, 2014).
22. Smetanin P, Stiff, D., Briante, C., Ahmad, S., Wong, L., and Ler, A. Life and Economic Burden of Lung Disease in Ontario: 2011 to 2041. . in *Risk Analytics, on behalf of the Ontario Lung Association* (2011).
23. Consumer Price Index, historical summary (1996 to 2015). in *CANSIM* Vol. 62-001-X and 62-010-X (ed. StatsCan) (Government of Canada, 2015).
24. Protection against radon-222 at home and at work. A report of a task group of the International Commission on Radiological Protection. *Ann ICRP* **23**, 1-45 (1993).
25. UNSCEAR. Effects of Atomic Radiation in *UNSCEAR 2000 Report to the General Assembly* Vol. I (2000).
26. Crapo JD, Barry BE, Gehr P et al. Cell number and cell characteristics of the normal human lung. *Am Rev Respir Dis* **126**, 332-7 (1982).
27. Census Profile - Census Program. in *2011 Census* Vol. Statistics Canada Catalogue no. 98-316-XWE. (ed. StatsCan) (Government of Canada, 2012).
28. 2012 Report on Cancer Statistics in Alberta. (Alberta Health Services Surveillance & Reporting, Edmonton AB, 2012).

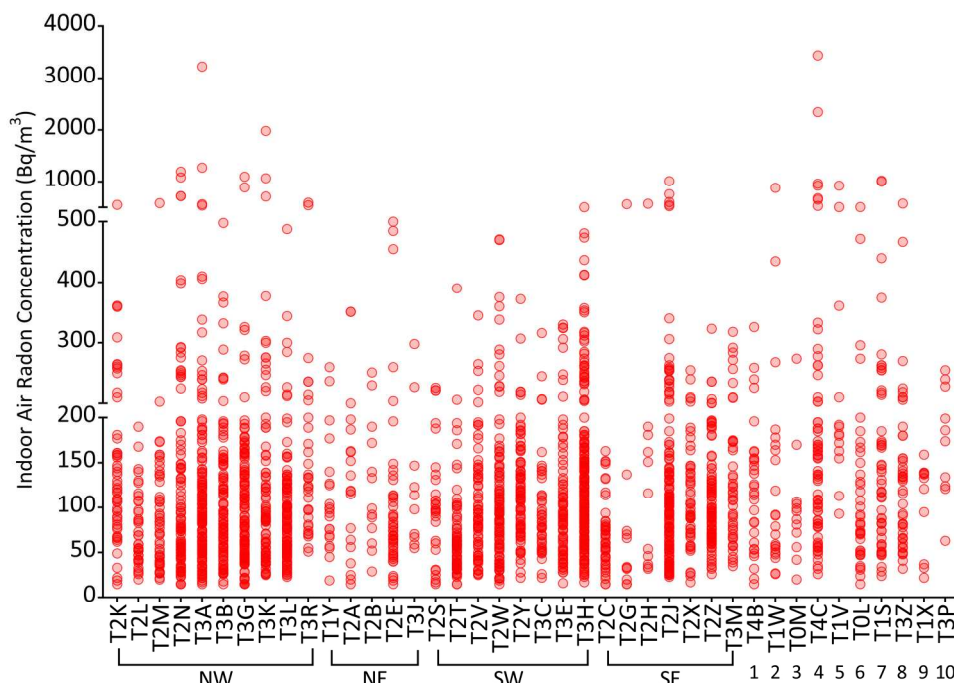

Figure 1. Indoor air radon concentrations by postal code district in the greater Calgary metropolitan area. 2,382 individual home readings for indoor air radon are grouped by the first three digits of Canadian postal code. Darker coloured circles indicate multiple overlapping radon readings. High radon concentrations are documented almost universally across the region. (1.Airdrie East, 2.Canmore, 3.Central Foothills, 4.Cochrane, 5. High River, 6. Kananaskis Improvement District, 7. Okotoks, 8. Redwood Meadows, 9. Chestermere, 10. Symons Valley.

200x145mm (300 x 300 DPI)

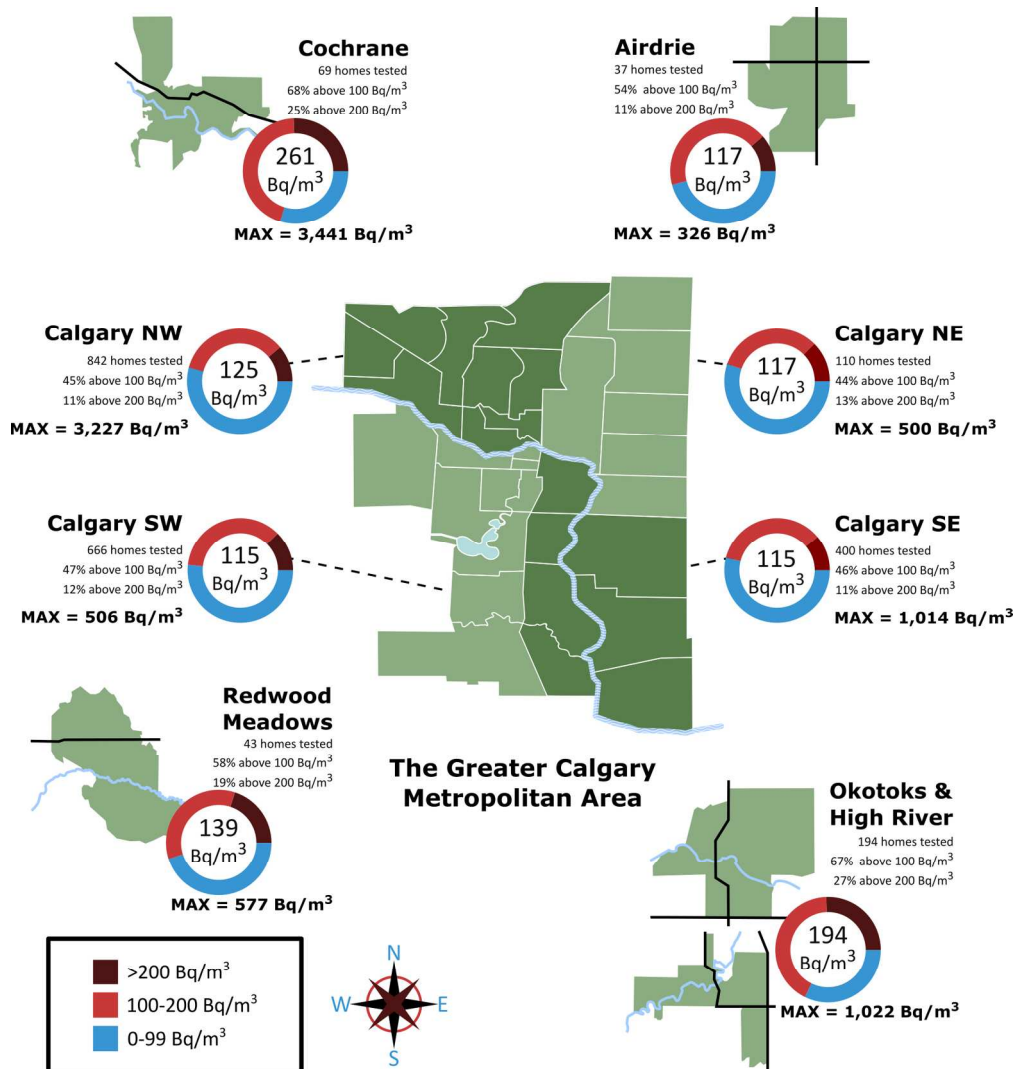

Figure 2. Average indoor air radon concentrations by subdivision of the greater Calgary metropolitan area. The percentage of homes between 0-100 Bq/m<sup>3</sup>, 100-200 Bq/m<sup>3</sup> or >200 Bq/m<sup>3</sup> for the four quadrants of Calgary and the surrounding towns, including number of homes tested in each region. Max = maximum observed radon reading in area; Min = minimum observed radon reading in area. In all cases, homes well above the maximum acceptable limit (200 Bq/m<sup>3</sup>) for Canada are documented.

541x578mm (89 x 89 DPI)

1  
2  
3  
4  
5  
6  
7  
8  
9  
10  
11  
12  
13  
14  
15  
16  
17  
18  
19  
20  
21  
22  
23  
24  
25  
26  
27  
28  
29  
30  
31  
32  
33  
34  
35  
36  
37  
38  
39  
40  
41  
42  
43  
44  
45  
46  
47  
48  
49  
50  
51  
52  
53  
54  
55  
56  
57  
58  
59  
60

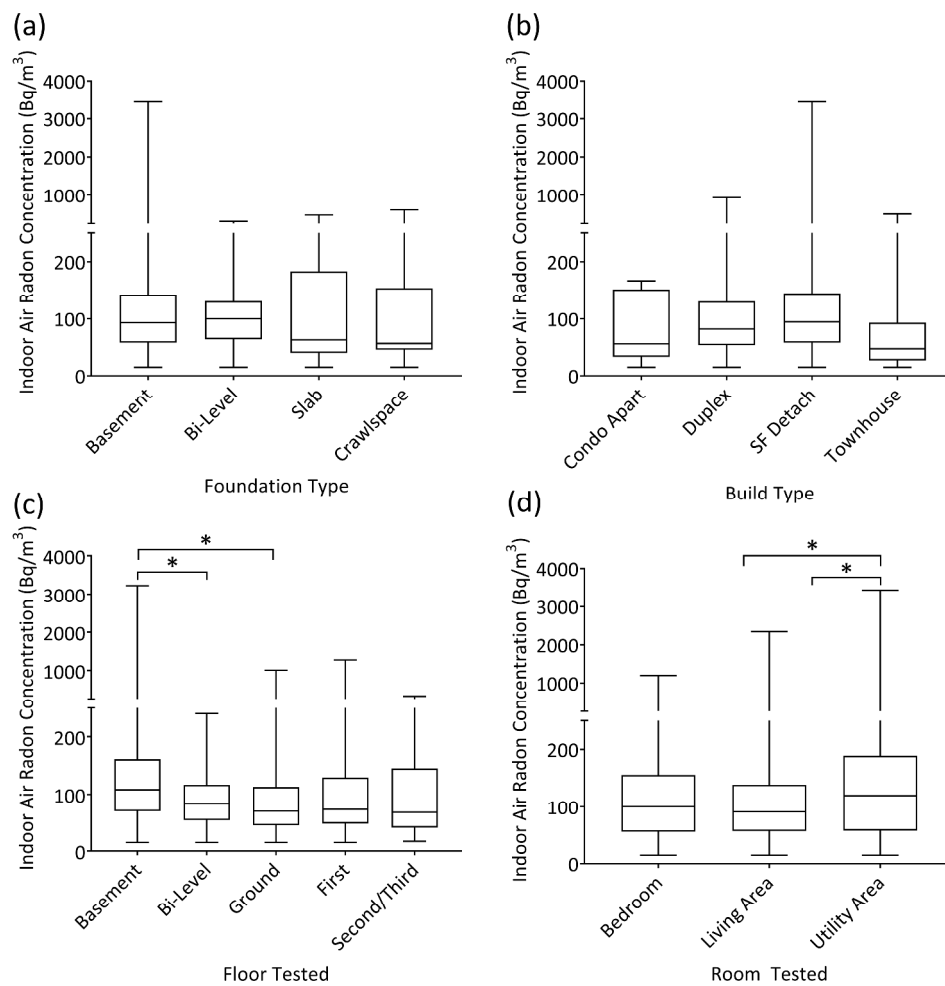

Figure 3. Average indoor air radon concentrations by home features. Box plots showing min/max spread and mean of indoor air radon tests within home descriptor groupings (\* $p \leq 0.001$ , Bonferroni Post hoc testing on one-way ANOVAs).



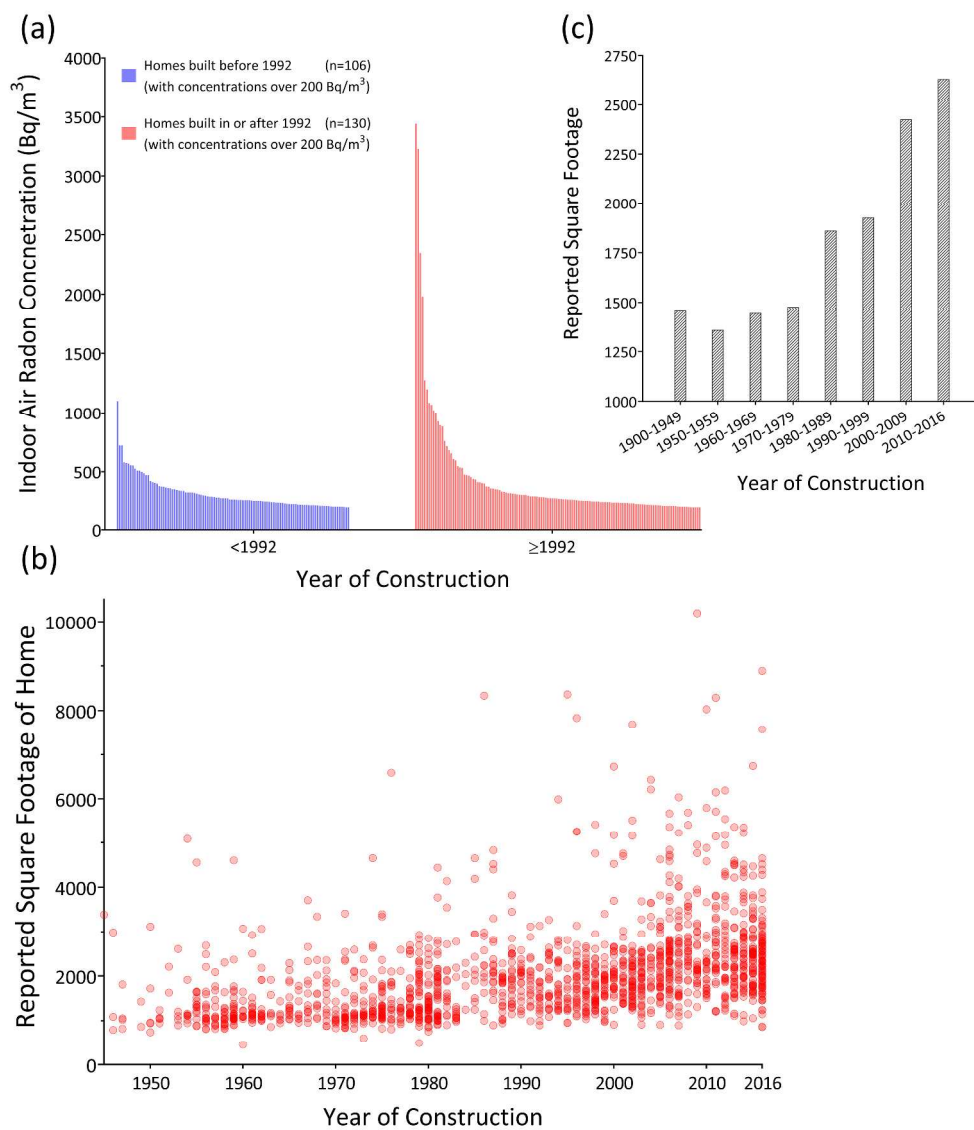

Figure 4. Maximum observed household air radon concentrations are significantly higher in homes built in the past 25 years. (A) Indoor air radon measured in homes built between 1992 and 2016 versus 1991 and earlier. (B) The reported square footage of homes constructed between 1945 and 2016. (C) Average home square footages across decades.

1  
2  
3  
4  
5  
6  
7  
8  
9  
10  
11  
12  
13  
14  
15  
16  
17  
18  
19  
20  
21  
22  
23  
24  
25  
26  
27  
28  
29  
30  
31  
32  
33  
34  
35  
36  
37  
38  
39  
40  
41  
42  
43  
44  
45  
46  
47  
48  
49  
50  
51  
52  
53  
54  
55  
56  
57  
58  
59  
60

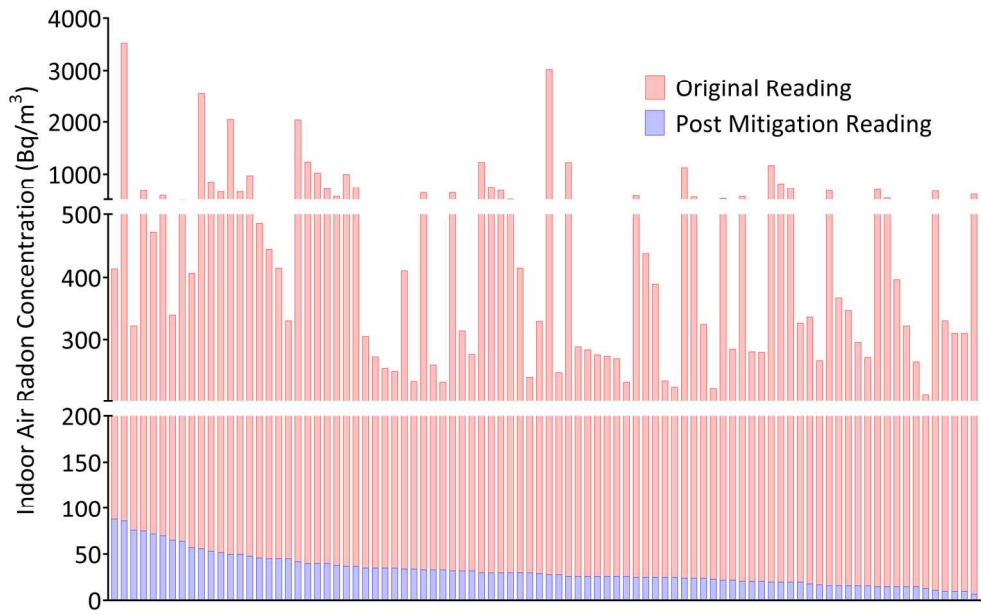

Figure 5. Pre- and post-mitigation household air radon concentrations for all homes initially measuring  $\geq 200$  Bq/m<sup>3</sup>. Red bars indicate radon levels prior to mitigation. Blue bars are the corresponding post-mitigation radon level for that same household.

178x112mm (300 x 300 DPI)

| HOME ENGINEERING METRIC | NUMBER OF HOMES REPORTING | AVERAGE RADON LEVEL (Bq/M <sup>3</sup> ) | STD. ERROR OF MEAN | MIN.OBS. RADON LEVEL (Bq/M <sup>3</sup> ) | MAX.OBS. RADON LEVEL (Bq/M <sup>3</sup> ) |
|-------------------------|---------------------------|------------------------------------------|--------------------|-------------------------------------------|-------------------------------------------|
| <b>TOTAL</b>            | 2382                      | 126                                      | ± 3                | <15                                       | 3441                                      |
| <b>AGE OF HOME</b>      |                           |                                          |                    |                                           |                                           |
| 1890-1990               | 1100                      | 108                                      | ± 3                | <15                                       | 1100                                      |
| 1991-2016               | 1029                      | 140                                      | ± 7                | <15                                       | 3441                                      |
| <b>BUILD</b>            |                           |                                          |                    |                                           |                                           |
| CONDO/APAR              | 12                        | 81                                       | ± 17               | <15                                       | 167                                       |
| SF DETACH               | 1819                      | 126                                      | ± 4                | <15                                       | 3441                                      |
| DUPLEX                  | 113                       | 108                                      | ± 10               | <15                                       | 925                                       |
| TOWNHOUSE               | 50                        | 76                                       | ± 12               | <15                                       | 498                                       |
| UNREPORTED              | 388                       | 136                                      | ± 6                | <15                                       | 1014                                      |
| <b>FOUNDATION</b>       |                           |                                          |                    |                                           |                                           |
| BASEMENT                | 1973                      | 125                                      | ± 4                | <15                                       | 3441                                      |
| SLAB                    | 28                        | 120                                      | ± 21               | <15                                       | 472                                       |
| BI-LEVEL                | 89                        | 106                                      | ± 6                | <15                                       | 309                                       |
| CRAWL SPACE             | 30                        | 95                                       | ± 20               | <15                                       | 607                                       |
| UNREPORTED              | 262                       | 144                                      | ± 8                | <15                                       | 1014                                      |
| <b>FLOOR</b>            |                           |                                          |                    |                                           |                                           |
| BASEMENT                | 1360                      | 137                                      | ± 4                | <15                                       | 3227                                      |
| BI-LEVEL                | 58                        | 91                                       | ± 6                | <15                                       | 240                                       |
| GROUND                  | 485                       | 62                                       | ± 4                | <15                                       | 1005                                      |
| FIRST                   | 246                       | 101                                      | ± 7                | <15                                       | 1274                                      |
| SECOND/THRD             | 31                        | 92                                       | ± 13               | 17                                        | 326                                       |
| UNREPORTED              | 202                       | 176                                      | ± 22               | 17                                        | 3441                                      |
| <b>ROOM</b>             |                           |                                          |                    |                                           |                                           |
| BEDROOM                 | 282                       | 125                                      | ± 7                | <15                                       | 1198                                      |
| LIVING SPACE            | 1740                      | 117                                      | ± 3                | <15                                       | 2346                                      |
| UTILITY SPACE           | 105                       | 224                                      | ± 48               | <15                                       | 3441                                      |
| UNREPORTED              | 255                       | 147                                      | ± 8                | <15                                       | 1014                                      |

Table1: Radon levels by home metrics. 2,382 household air radon readings grouped according to reported building metrics with average indoor air radon concentrations, error of the mean, and range.
